# Supplementary material
Source: Springer Nature journal article supplement (https://www.springerprofessional.de/resource/supplementary/13677_2012_29_MOESM2_ESM.pdf/10743508)
Supplement: MOESM2 [file 10743508]

| Domain-specific expectation | Sources of trust                                                 |                                           |                                      |
|-----------------------------|------------------------------------------------------------------|-------------------------------------------|--------------------------------------|
|                             | Competency                                                       | Good will / intention                     | Integrity / consistency              |
| Performance                 | Availability;<br>Reliability;<br>...                             | <Constant efforts to improve performance> | <Consistency shown by historic data> |
| Security                    | Security cert;<br>Security breach rate;<br>...                   | <Constant efforts to improve security>    | <Consistency shown by historic data> |
| Privacy                     | Privacy regulation compliance;<br>Privacy violation rate;<br>... | <Constant efforts to improve privacy>     | <Consistency shown by historic data> |
